# Supplementary material for: The Shh receptor Boc is important for myelin formation and repair
Source: Oxford University Press journal article supplement (doi:10.1242/dev.172502), 2019-05-01
Supplement: dev172502supp.pdf [file dev172502supp.pdf]

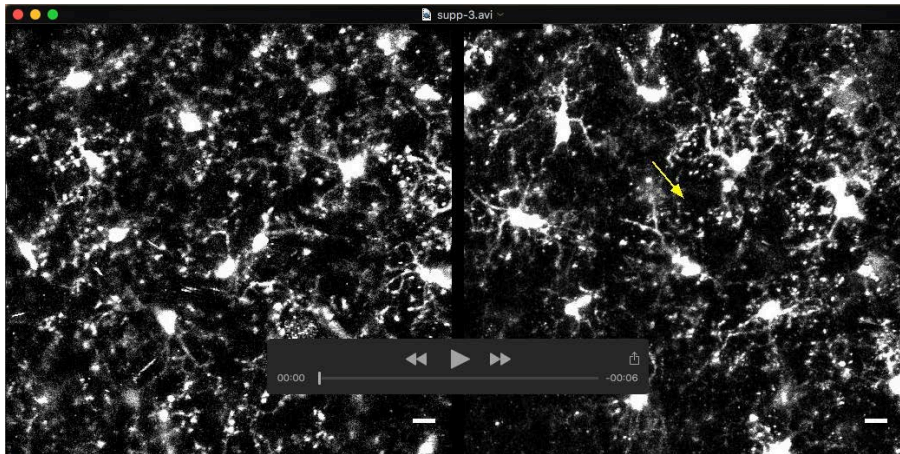

**Movie 1. Movie derived from live imaging of YFP<sup>+</sup> microglia/macrophage in the cerebral cortex grey matter of CX3CR1/YFP WT and Boc mutant mice at D8. The arrow indicates a microglia/macrophage displaying one SFE in the mutant, while no SFE is detected in the WT. Scale bar: 10  $\mu$ m.**
